# Supplementary material for: Mechanical loading and hyperosmolarity as a daily resetting cue for skeletal circadian clocks
Source: PubMed Central journal article supplement (PMC10646113; doi:10.1038/s41467-023-42056-1), 2023-11-14
Supplement: 41467_2023_42056_MOESM3_ESM.pdf [file 41467_2023_42056_MOESM3_ESM.pdf]

## **Description of Additional Supplementary Files**

**Supplementary Data 1:** Primary Chondrocytes Osmotic stress RNAseq Rhythmic Genes

**Supplementary Data 2:** Primary Chondrocytes Osmotic stress RNAseq T0 vs T4 DEGs

**Supplementary Data 3:** Primary Chondrocytes Osmotic stress RNAseq Rhythmic Canonical Pathways

**Supplementary Data 4:** Primary Chondrocytes Osmotic stress RNAseq Rhythmic Upstream Regulators

**Supplementary Data 5:** Primary Chondrocytes Osmotic stress RNAseq T0 vs T4

**Supplementary Data 6:** Primary Chondrocytes Osmotic stress RNAseq T0 vs T4

**Supplementary Data 7:** Cartilage Running WT DEGs

**Supplementary Data 8:** IVD Running WT DEGs

**Supplementary Data 9:** Cartilage Running Canonical Pathways

**Supplementary Data 10:** Cartilage Running Upstream Regulators

**Supplementary Data 11:** IVD Running Canonical Pathways

**Supplementary Data 12:** IVD Running Upstream Regulators

**Supplementary Movie 1:** Bioluminescence imaging of PER2::Luc mouse spine segment. The tissue was synchronised with Dex at the beginning of recording. After 3 days sorbitol was added to increase osmolarity by +200 mOsm.
